# Supplementary material for: Effect of Thallium(I) on Growth, Nutrient Absorption, Photosynthetic Pigments, and Antioxidant Response of Dittrichia Plants
Source: MDPI journal article supplement (doi:10.3390/antiox12030678), 2023-03-09
Supplement: s1 [file s1]

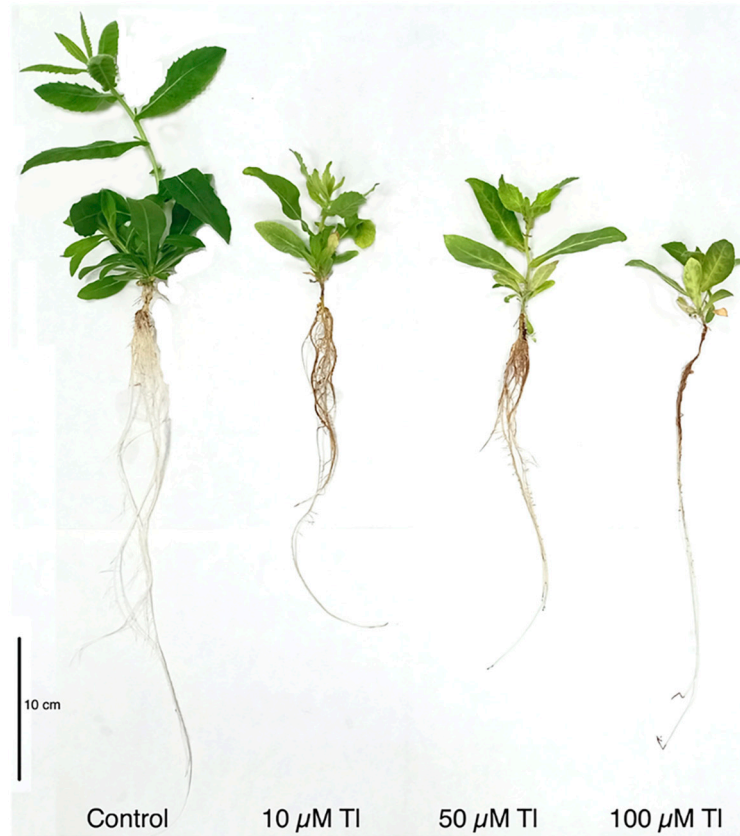

**Figure S1.** *Dittrichia viscosa* plants subjected to Tl toxicity for 7 days.

**Table S1.** Effect of Tl toxicity on the relative water content (RWC) in roots and leaves of *D. viscosa* plants. The data are the means  $\pm$  SE from ten independent experiments.

| Treatments     | Roots             | Leaves             |
|----------------|-------------------|--------------------|
| Control        | 95.00 $\pm$ 1.12a | 91.65 $\pm$ 1.95a  |
| 10 $\mu$ M Tl  | 94.71 $\pm$ 0.97a | 91.70 $\pm$ 1.79a  |
| 50 $\mu$ M Tl  | 97.02 $\pm$ 1.58a | 88.75 $\pm$ 0.57ab |
| 100 $\mu$ M Tl | 96.53 $\pm$ 0.81a | 84.75 $\pm$ 0.97a  |

The different letters indicate significant differences at  $p < 0.05$ .

**Table S2.** Effect of Tl toxicity on the translocation factor of K (TF<sub>K</sub>), Mg (TF<sub>Mg</sub>), Ca (TF<sub>Ca</sub>), Fe (TF<sub>Fe</sub>), Mn (TF<sub>Mn</sub>), Cu (TF<sub>Cu</sub>), and (TF<sub>Zn</sub>) of *D. viscosa* plants. The data are the means  $\pm$  SE from ten independent experiments.

| Treatments     | TF <sub>K</sub>  | TF <sub>Mg</sub> | TF <sub>Ca</sub> | TF <sub>Fe</sub> | TF <sub>Mn</sub> | TF <sub>Cu</sub> | TF <sub>Zn</sub> |
|----------------|------------------|------------------|------------------|------------------|------------------|------------------|------------------|
| Control        | 1.15 $\pm$ 0.01b | 0.24 $\pm$ 0.10b | 0.32 $\pm$ 0.01b | 0.03 $\pm$ 0.01b | 0.07 $\pm$ 0.01b | 0.27 $\pm$ 0.01a | 0.80 $\pm$ 0.16a |
| 10 $\mu$ M Tl  | 0.84 $\pm$ 0.05c | 0.47 $\pm$ 0.10a | 0.73 $\pm$ 0.05a | 0.06 $\pm$ 0.00a | 0.16 $\pm$ 0.01a | 0.20 $\pm$ 0.01b | 0.64 $\pm$ 0.06b |
| 50 $\mu$ M Tl  | 1.05 $\pm$ 0.00b | 0.43 $\pm$ 0.12a | 0.41 $\pm$ 0.04b | 0.03 $\pm$ 0.01b | 0.13 $\pm$ 0.04a | 0.15 $\pm$ 0.02c | 0.42 $\pm$ 0.09c |
| 100 $\mu$ M Tl | 1.42 $\pm$ 0.03a | 0.45 $\pm$ 0.02a | 0.27 $\pm$ 0.05c | 0.02 $\pm$ 0.01c | 0.13 $\pm$ 0.05a | 0.11 $\pm$ 0.01d | 0.32 $\pm$ 0.03d |

The different letters indicate significant differences at  $p < 0.05$ .
